# Supplementary material
Source: PubMed Central journal article supplement (PMC4076429)
Supplement: NIHMS548210-supplement-1.pdf [file NIHMS548210-supplement-1.pdf]

Supplementary Information for

**Direct nitration and azidation of aliphatic carbons by an iron-dependent  
halogenase**

Megan L Matthews, Wei-chen Chang, Andrew P Layne, Linde A Miles, Carsten Krebs, J  
Martin Bollinger Jr

## SUPPLEMENTARY RESULTS

**Supplementary Table 1.** Parameters derived from titrations monitoring binding of anions to the SyrB2•Fe(II)• $\alpha$ KG and SyrB2-A118G•Fe(II)• $\alpha$ KG complexes.  $K_D$  values were determined by plotting  $\Delta$ Abs at the wavelength of maximum change versus  $[Y^-]$  and applying a hyperbolic or quadratic fit, as appropriate for the weak- and tight-binding regimes, respectively (See **Supplementary Figs. 4, 5, 10, 11**).

| Anion       | Formula                       | $K_D$ (mM)   | $\lambda$ (nm) | Number of Trials <sup>b</sup> | $K_D$ (mM)    | $\lambda$ (nm) | Number of Trials <sup>b</sup> |
|-------------|-------------------------------|--------------|----------------|-------------------------------|---------------|----------------|-------------------------------|
|             |                               | WT SyrB2     |                |                               | A118G         |                |                               |
| chloride    | Cl <sup>-</sup>               | 0.05 ± 0.025 | 530            | 6                             | 43 ± 15       | 530            | 3                             |
| cyanide     | CN <sup>-</sup>               | 0.14 ± 0.05  | 515            | 2                             | <i>c</i>      | <i>c</i>       | 3                             |
| sulfide     | HS <sup>-</sup>               | 0.47 ± 0.012 | 540            | 3                             | <i>a</i>      | <i>a</i>       | 3                             |
| cyanate     | OCN <sup>-</sup>              | 0.2 ± 0.14   | 540            | 2                             | 0.030 ± 0.015 | 540            | 3                             |
| azide       | N <sub>3</sub> <sup>-</sup>   | 0.12 ± 0.005 | 545            | 2                             | 0.15 ± 0.03   | 540            | 3                             |
| bromide     | Br <sup>-</sup>               | 0.47 ± 0.15  | 525            | 3                             | 20 ± 7        | 520            | 2                             |
| formate     | HCO <sub>2</sub> <sup>-</sup> | ~ 3          | 530            | 1                             | <i>a</i>      | <i>a</i>       | 1                             |
| nitrite     | NO <sub>2</sub> <sup>-</sup>  | ~ 0.072      | 460            | 1                             | <i>c</i>      | <i>c</i>       | 1                             |
| thiocyanate | SCN <sup>-</sup>              | <i>a</i>     | <i>a</i>       | 2                             | 0.34 ± 0.18   | 515            | 2                             |

<sup>a</sup> No evidence for binding.

<sup>b</sup> In some trials, the  $[\alpha$ KG] was 1.5 mM rather than 5 mM. This difference had no effect on the anion affinity.

<sup>c</sup> Titration spectra were anomalous as a consequence of features either inherent to the anion (NO<sub>2</sub><sup>-</sup>) or that developed upon interaction with components in the solution [likely between the anion and free Fe(II) ions].

**Supplementary Table 2.** Comparison of Mössbauer parameters of quadrupole doublets associated with Fe(IV) complexes formed in SyrB2 in the presence of various substrates and anions.

| Substrate                   | Anion/Enzyme                        | Total Fe(IV) | $\delta_1$ (mm/s) | $\Delta E_{Q,1}$ (mm/s) | $\delta_2$ (mm/s) | $\Delta E_{Q,2}$ (mm/s) | $\Gamma_{1,2}$ (mm/s) | Fraction Fe(IV) <sub>1</sub> :Fe(IV) <sub>2</sub> |
|-----------------------------|-------------------------------------|--------------|-------------------|-------------------------|-------------------|-------------------------|-----------------------|---------------------------------------------------|
| Thr-S-SyrB1 <sup>a</sup>    | Cl <sup>-</sup> /SyrB2              | -            | 0.30              | 1.09                    | 0.23              | 0.76                    | 0.22                  | 4:1                                               |
| Thr-S-SyrB1                 | N <sub>3</sub> <sup>-</sup> /SyrB2  | 0.78         | -                 | -                       | 0.20              | 0.77                    | 0.40                  | -                                                 |
| d <sub>5</sub> -Thr-S-SyrB1 | HS <sup>-</sup> /SyrB2              | 0.43         | -                 | -                       | 0.25              | 1.14                    | 0.23                  | -                                                 |
| d <sub>5</sub> -Thr-S-SyrB1 | CN <sup>-</sup> /SyrB2              | 0.41         | -                 | -                       | 0.22              | 0.99                    | 0.40                  | -                                                 |
| d <sub>5</sub> -Thr-S-SyrB1 | NO <sub>2</sub> <sup>-</sup> /SyrB2 | 0.37         | -                 | -                       | 0.32              | 1.20                    | 0.25                  | -                                                 |
| d <sub>5</sub> -Nva-S-SyrB1 | Cl <sup>-</sup> /SyrB2              | 0.49         | 0.25              | 1.19                    | 0.23              | 0.74                    | 0.27                  | 0.33:0.66                                         |

<sup>a</sup> ref. <sup>1</sup>

**Supplementary Table 3.** Comparison of Mössbauer parameters of quadrupole doublets associated with the Fe(II) starting complexes formed in SyrB2 in the presence of various substrates and anions.

| Substrate                   | Anion/Enzyme                        | $\delta_1$ (mm/s) | $\Delta E_{Q,1}$ (mm/s) | $\delta_2$ (mm/s) | $\Delta E_{Q,2}$ (mm/s) | $\Gamma_{1,2}$ (mm/s) | Ratio Fe(II) <sub>1</sub> :Fe(II) <sub>2</sub> |
|-----------------------------|-------------------------------------|-------------------|-------------------------|-------------------|-------------------------|-----------------------|------------------------------------------------|
| Thr-S-SyrB1 <sup>a</sup>    | Cl <sup>-</sup> /SyrB2              | 1.22              | 2.87                    | 1.07              | 2.62                    | 0.26                  | 7:1                                            |
| d <sub>5</sub> -Thr-S-SyrB1 | no Y <sup>-</sup> /SyrB2            | 1.25              | 2.95                    | 1.18              | 2.30                    | 0.37                  | 0.95:0.10                                      |
| Thr-S-SyrB1                 | N <sub>3</sub> <sup>-</sup> /SyrB2  | 1.22              | 2.93                    | 1.12              | 1.95                    | 0.32                  | 0.90:0.10                                      |
| d <sub>5</sub> -Thr-S-SyrB1 | HS <sup>-</sup> /SyrB2              | 1.17              | 3.15                    | 1.03              | 2.79                    | 0.26                  | 0.72:0.28                                      |
| d <sub>5</sub> -Thr-S-SyrB1 | CN <sup>-</sup> /SyrB2              | 1.23              | 2.87                    | 1.14              | 3.20                    | 0.38                  | 0.65:0.35                                      |
| d <sub>5</sub> -Thr-S-SyrB1 | NO <sub>2</sub> <sup>-</sup> /SyrB2 | 1.15              | 2.35                    | 1.32              | 2.95                    | 0.40                  | 0.86:0.14                                      |
| d <sub>5</sub> -Thr-S-SyrB1 | Cl <sup>-</sup> /SyrB2              | 1.27              | 2.77                    | 1.06              | 2.51                    | 0.27                  | 0.40:0.60                                      |

<sup>a</sup>ref <sup>1</sup>

**Supplementary Table 4.** MS fragmentations corresponding to relevant parent ions and iminium daughter ions of Aba-derived substrates and products in the reaction with SyrB2.

| Product                                                           | Parent m/z | Daughter m/z |
|-------------------------------------------------------------------|------------|--------------|
| L-glycine                                                         | 76.1       | 30.1         |
| Aba                                                               | 104.1      | 58.1         |
| 3,3- <i>d</i> <sub>2</sub> -Aba                                   | 106.1      | 60.1         |
| 4-N <sub>3</sub> -Aba                                             | 145.1      | 99.1         |
| 3,3- <i>d</i> <sub>2</sub> -4-N <sub>3</sub> -Aba                 | 147.1      | 101.1        |
| 3,3- <i>d</i> <sub>2</sub> -4- <sup>15</sup> NN <sub>2</sub> -Aba | 148.1      | 102.1        |
| 4-NO <sub>2</sub> -Aba                                            | 149.1      | 103.1        |
| 3,3- <i>d</i> <sub>2</sub> -4-NO <sub>2</sub> -Aba                | 151.1      | 105.1        |
| 3,3- <i>d</i> <sub>2</sub> -4- <sup>15</sup> NO <sub>2</sub> -Aba | 152.1      | 106.1        |

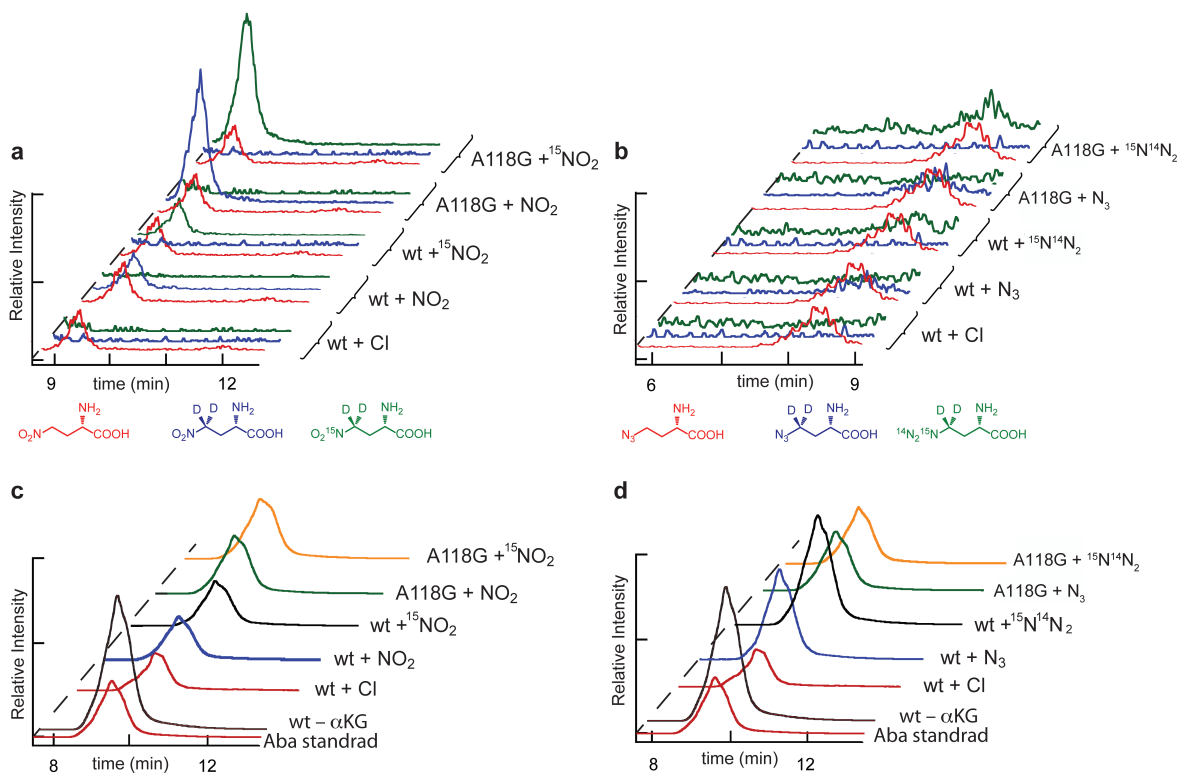

**Supplementary Figure 1.** LC-MS/MS chromatograms comparing yields of the C–N coupling products and substrate consumption in the reactions of the wild-type SyrB2 and A118G variant. Panel **a** illustrates detection of the nitration product and **b** the azidation product. Panels **c** and **d** illustrate the 3-*d*<sub>2</sub>-Aba recovered after hydrolysis of the substrate in reactions of **a** and **b**, respectively. For each reaction condition in **a** and **b** along the *z*-axis, defined by the enzyme (wild-type vs. A118G) and anion added, parent-to-daughter ion transitions (**Supplementary Table 4**) for the unlabeled nitrogenous product standard added to the reaction sample (*red*) and the authentic products formed from the 3-*d*<sub>2</sub>-Aba-*S*-SyrB1 substrate with either natural abundance (*blue*) or isotopically enriched (+1) NO<sub>2</sub><sup>−</sup>/N<sub>3</sub><sup>−</sup> (*green*) anion were monitored. Only the transition for the standard is observed for reactions with the wild-type enzyme in the presence of Cl<sup>−</sup> (*first condition along z-axis in a and b*). In **c** and **d**, the transition for 3-*d*<sub>2</sub>-Aba is compared to that for both an unlabeled

Aba standard and 3- $d_2$ -Aba recovered in the control reaction lacking  $\alpha$ KG. The reactions were performed as described in *Online Methods*, with the following exceptions. The final concentrations of the reactants were 0.25 mM Fe(II), 0.25 mM SyrB2, 0.325 mM  $\alpha$ KG, 0.090 mM 3- $d_2$ -Aba-*S*-SyrB1 and 1.25 mM  $\text{NO}_2^-$  (**a** and **c**) or  $\text{N}_3^-$  (**b** and **d**). The 3- $d_2$ -Aba-*S*-SyrB1 substrate was assembled by incubation of 0.18 mM holo-SyrB1, 0.11 mM 3- $d_2$ -Aba, 2.2 mM ATP, and 2.2 mM  $\text{MgSO}_4$  for 30 min at ambient temperature and was used without desalting. Note that differences in the reaction conditions used here (specifically, greater  $\alpha$ KG and  $\text{N}_3^-$  concentrations) with respect to those used in the experiment of *Figure 5* result in a lesser enhancement of azidation by the A118G variant relative to the wild-type enzyme and a greater enhancement of nitration. The figure depicts a single trial, which is one of several replicates.

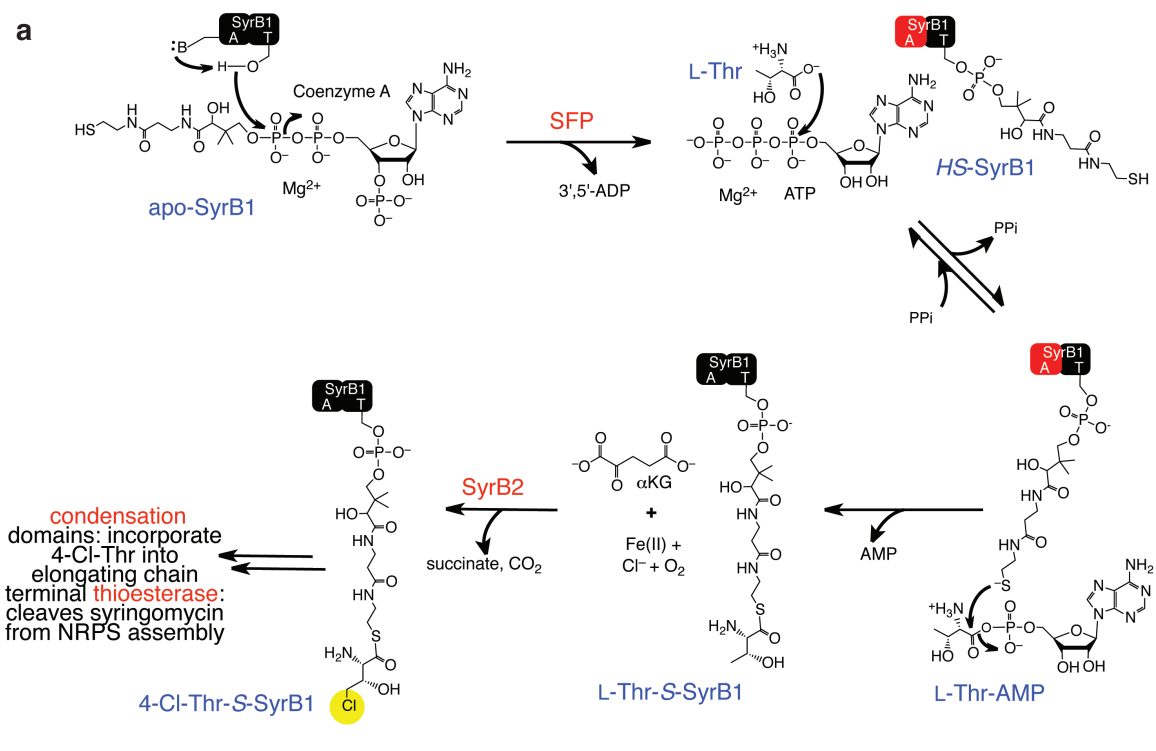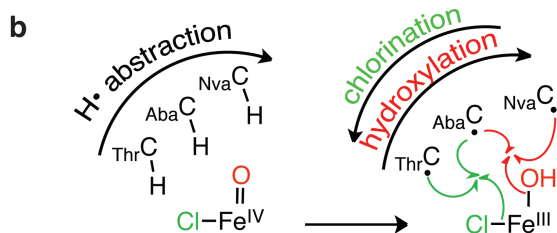

**Supplementary Figure 2.** (a) Assembly and chlorination of the native SyrB2 substrate, L-threonine appended to the phosphopantetheine cofactor of SyrB1 (abbreviated Thr-S-SyrB1). In the Syr halogenation system, the amino-acid-charging (adenylation) function and carrier protein are fused in a single polypeptide, SyrB1. (b) Enhanced hydrogen abstraction in Aba-S-SyrB1, and even more so in the L-norvalinyl-S-SyrB1 substrate, Nva-S-SyrB1, is correlated with enhanced hydroxylation<sup>2</sup>.

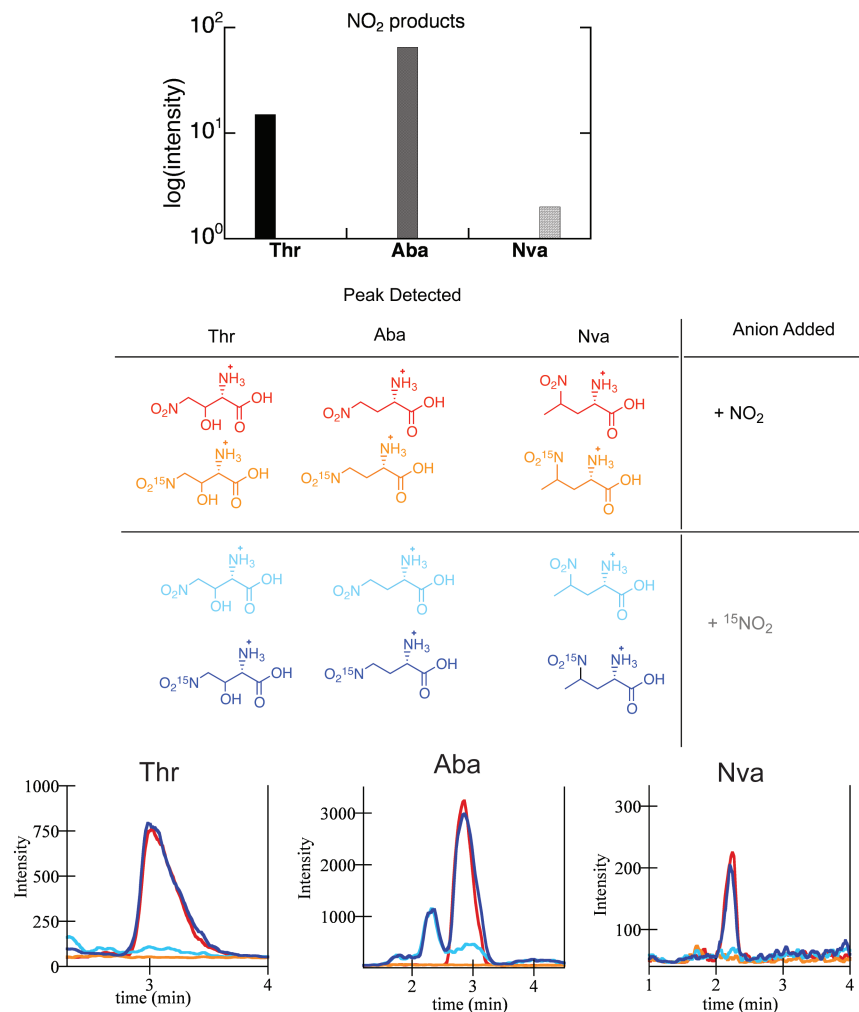

**Supplementary Figure 3.** Analysis of relative nitration yields in the reactions with the native, chlorination-predominant Thr-*S*-SyrB1 substrate, the ambivalent Aba-*S*-SyrB1 substrate, and the hydroxylation-predominant Nva-*S*-SyrB1 substrate. **Top:** bar graph showing intensities of the peaks for the nitration products of the three substrates. **Middle:** color key for the chromatograms at bottom. Note that the structure of the detected nitro-Nva product (specifically, the carbon to which the nitro group is attached) is not known but is assumed on the basis of published results<sup>2</sup>. **Bottom:** LC-MS SIM chromatograms for the nitration products of the three substrates produced by SyrB2 in the presence of <sup>14</sup>NO<sub>2</sub><sup>-</sup> or <sup>15</sup>NO<sub>2</sub><sup>-</sup>. The reactions were carried out with 0.6 mM of each reaction

component [SyrB2, Fe(II),  $\alpha$ KG, aminoacyl-*S*-SyrB1 (Thr-*S*-SyrB1, Aba-*S*-SyrB1, or Nva-*S*-SyrB1), and  $^{14}\text{NO}_2^-$  or  $^{15}\text{NO}_2^-$ ]. Subsequent to initiation by addition of the Thr-*S*-SyrB1, Aba-*S*-SyrB1, or Nva-*S*-SyrB1 substrate,  $\text{O}_2$ -saturated reaction buffer was added to bring  $[\text{O}_2]$  to  $\sim 0.6$  mM. L-glycine, an amino acid that SyrB1 cannot append to its carrier domain, was added as normalization standard to 0.6 mM. The products and the remaining SyrB1-appended  $d_2$ -Aba were released from the carrier protein by treatment with KOH (0.25 M). After a 1 min incubation at room temperature, an approximately equal volume of 1.5 %  $\text{HClO}_4$  (in water) sufficient to achieve pH neutrality was added, and the neutral solution was stored at  $-20$  °C for 1 h to permit precipitation of  $\text{KClO}_4$ . Protein was removed from the samples by using a Microcon centrifugal filter unit (Millipore) with a 10-kDa molecular mass cut-off filter. The chromatography was performed as previously described<sup>2</sup>, with the exception that the ZIC-HILIC column was developed isocratically at 0.3 mL/min with a 70%/30% acetonitrile/20 mM ammonium formate (pH 6) mobile phase. In each acquisition method, parent amino acid cations and iminium daughter ions produced from a neutral loss of  $\text{CO}_2$  and  $\text{H}_2$  (a combined mass of 46 atomic mass units) were selectively monitored (see *Supplementary Table 4* for MS fragmentations). The results are from a single trial.



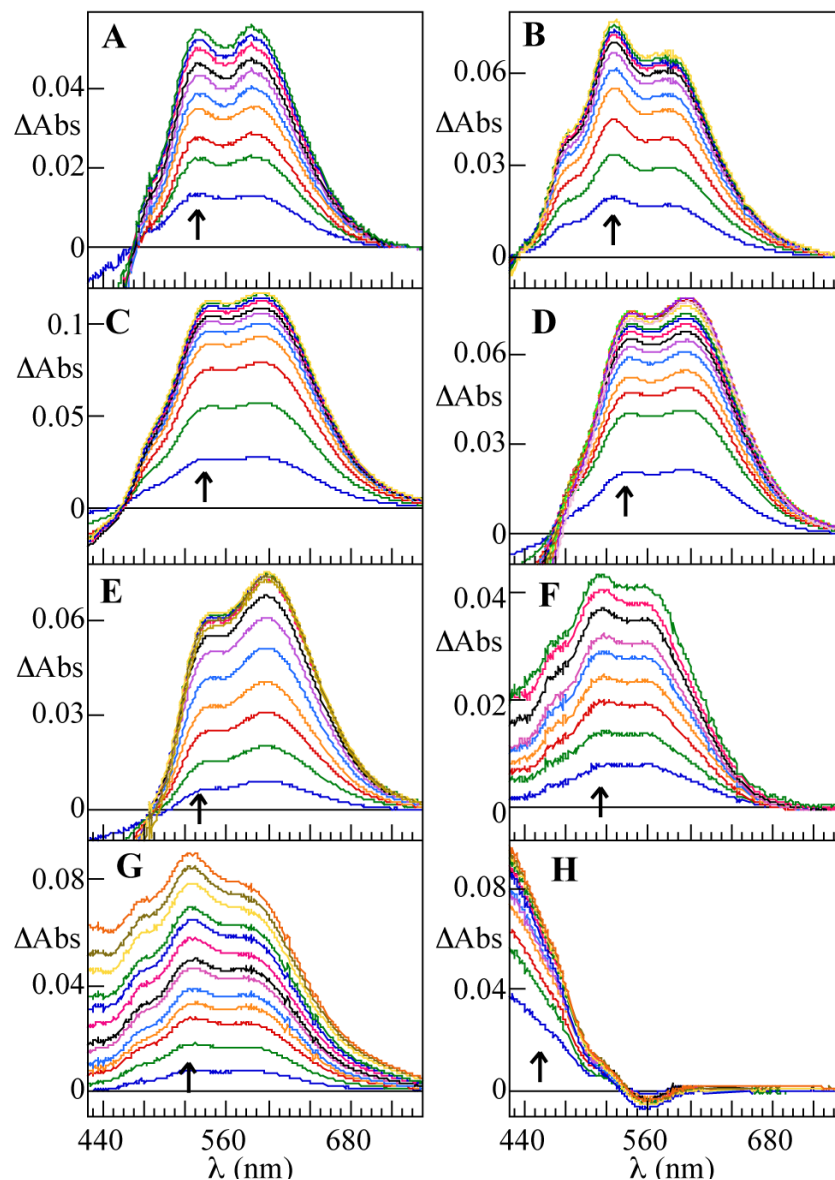

**Supplementary Figure 4.** Effect of anion binding on the MLCT absorption band during titration of (a)  $\text{Cl}^-$ , (b)  $\text{Br}^-$ , (c)  $\text{N}_3^-$ , (d)  $\text{OCN}^-$ , (e)  $\text{HS}^-$ , (f)  $\text{CN}^-$ , (g)  $\text{HCO}_2^-$ , or (h)  $\text{NO}_2^-$  into a solution of 0.75 mM Fe(II), 5 mM  $\alpha\text{KG}$ , and 1 mM SyrB2. **a**, **c**, and **h** are duplicated from **Figure 3** in the main manuscript to facilitate comparison. The anion concentrations after each addition are shown as the x-axes in **Supplementary Figure 5**. Each panel represents a single trial.

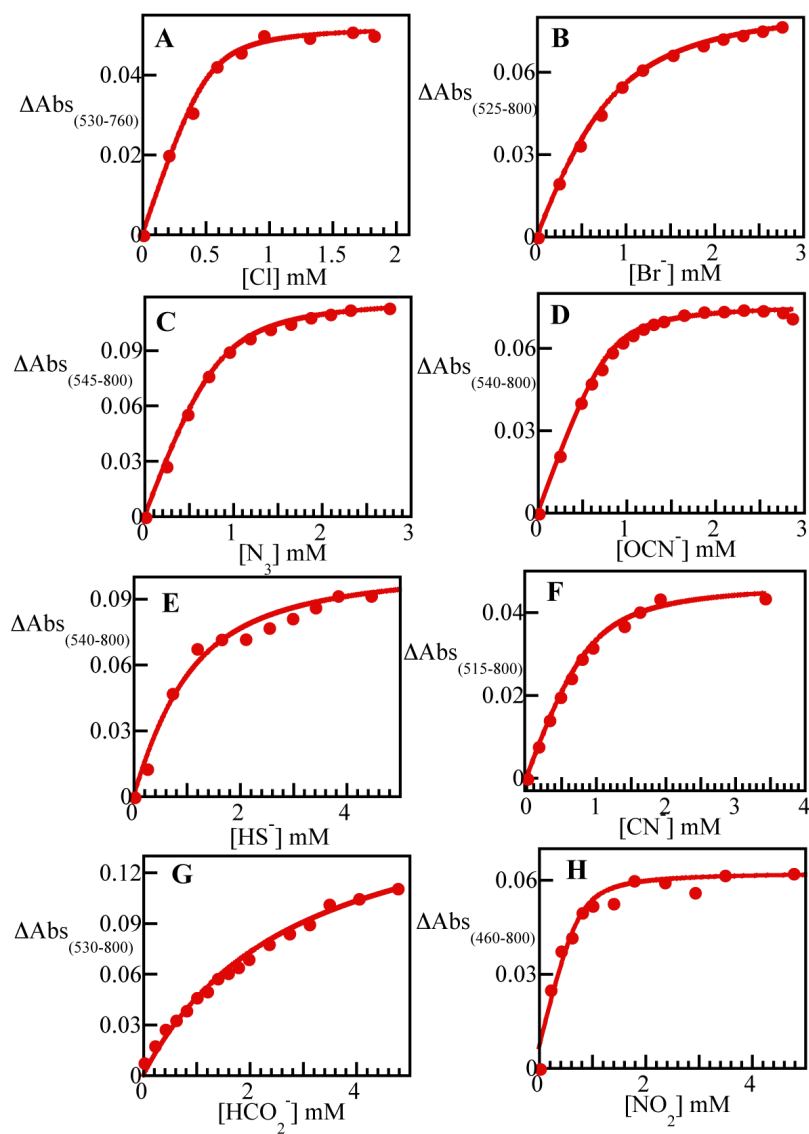

**Supplementary Figure 5.** Plots of the change in absorbance versus  $[Y^-]$  obtained from the titrations depicted in **Supplementary Figure 4**. Anion  $K_D$  values (summarized in **Supplementary Table 1**) were determined by fitting the data to a hyperbolic binding equation (if in the weak-binding regime, as in **g** and **h**) or the quadratic binding equation (if in the tight-binding regime, as in **a-f**). Each panel represents a single trial.

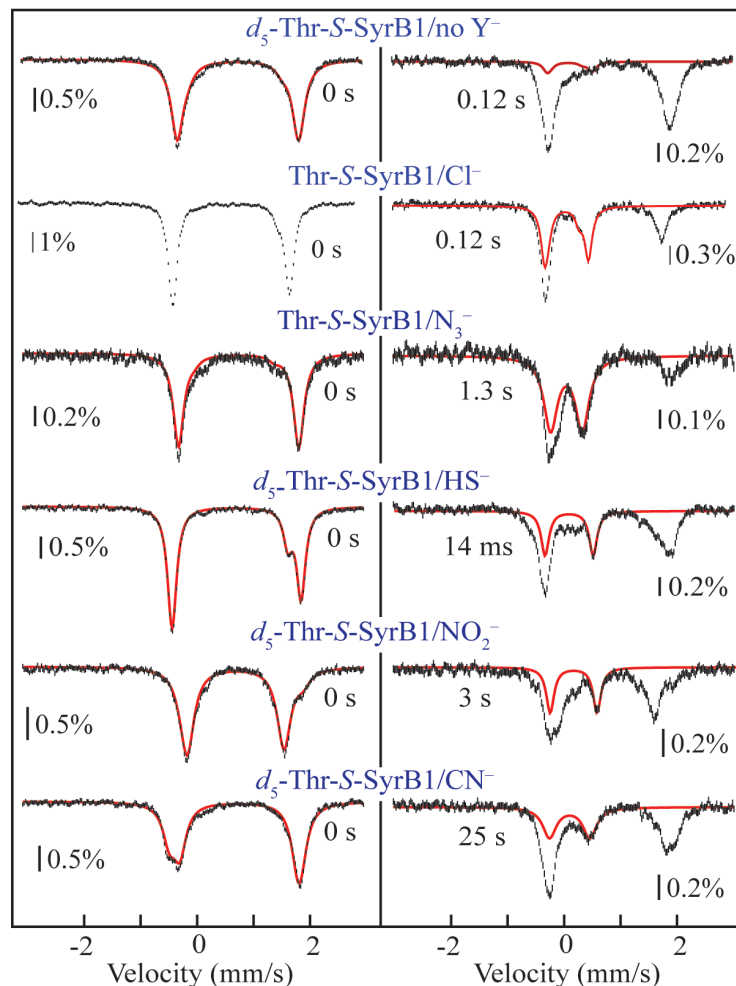

**Supplementary Figure 6.** Mössbauer spectra of selected samples prepared by reacting the  $\text{SyrB2}\cdot\text{Fe(II)}\cdot\alpha\text{KG}\cdot d_5\text{-Thr-S-SyrB1}$  complex (unlabeled Thr-S-SyrB1 in the case of the reactions with  $\text{N}_3^-$  and  $\text{Cl}^-$ ) in the presence of the indicated anion at 5 °C with  $\text{O}_2$ -saturated buffer. Reaction times are indicated. A doublet indicative of Fe(IV) is absent in the sample for which no anion was intentionally added. Solid lines (in red) are simulations of the summation of the Fe(II) components (*left panel*) or Fe(IV) component(s) (*right panel*). **Supplementary Tables 2 and 3** summarize the isomer shifts, quadrupole splittings, line widths, and fractional intensities assumed in each simulation. Each spectrum represents a single trial.

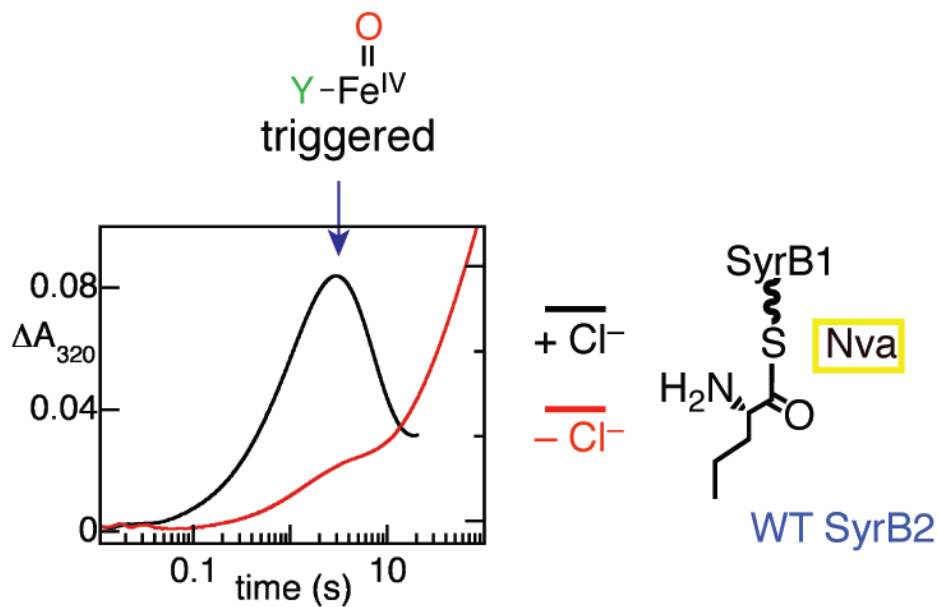

**Supplementary Figure 7.** Demonstration of aminoacyl-S-SyrB1-dependent chloride triggering in SyrB2 with the substrate previously shown to undergo primarily hydroxylation (Nva-S-SyrB1). Absorbance (320 nm)-versus-time traces obtained in stopped-flow experiments are analogous to those in **Figure 4**. An  $\text{O}_2$ -saturated buffer solution was mixed with an equal volume of an  $\text{O}_2$ -free solution containing Fe(II),  $\alpha\text{KG}$ , WT-SyrB2, and Nva-S-SyrB1 in the absence (*red trace*) or presence (*black trace*) of excess  $\text{Cl}^-$  (50 mM). Each trace is an average of at least three trials (stopped-flow "shots").

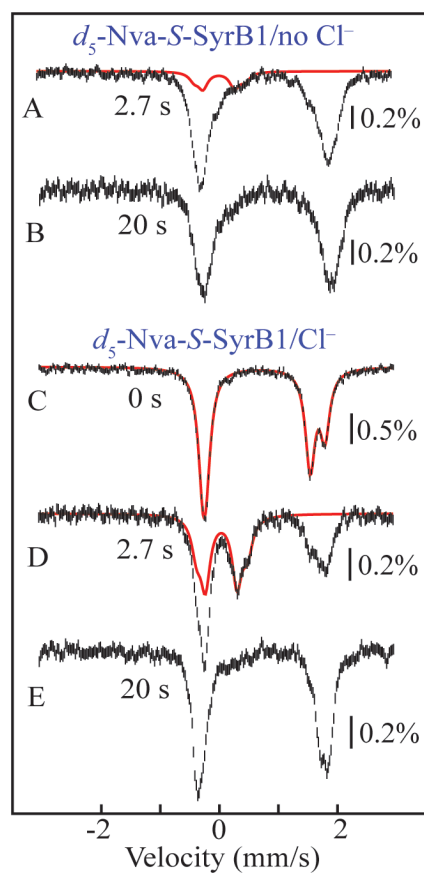

**Supplementary Figure 8.** Mössbauer spectra of selected samples prepared by mixing the  $\text{SyrB2}\cdot\text{Fe(II)}\cdot\alpha\text{KG}\cdot d_5\text{-Nva-S-SyrB1}$  complex, in the absence or presence of added  $\text{Cl}^-$ , with  $\text{O}_2$ -saturated buffer and freeze-quenching at the indicated reaction times, which were chosen on the basis of the kinetic traces in **Supplementary Figure 7**. Solid red lines are simulations of the summation of the Fe(II) components (in the 0-s sample) or Fe(IV) components of the  $\text{Cl-Fe(IV)=O}$  states (in the 2.7-s samples) with parameters reported in **Supplementary Tables 2** and **3**. The upper limit for the intensity that can be attributed to Fe(IV) in **a** is  $\sim 20\%$  of the corresponding intensity in **d** (red line). This intensity corresponds to just  $\sim 10\%$  of the total iron content, or  $\sim 40\ \mu\text{M}$  of the Fe(IV) complex, and is attributed to the  $\text{Cl-Fe(IV)=O}$  intermediate generated from contaminating  $\text{Cl}^-$ . Each spectrum represents a single trial.

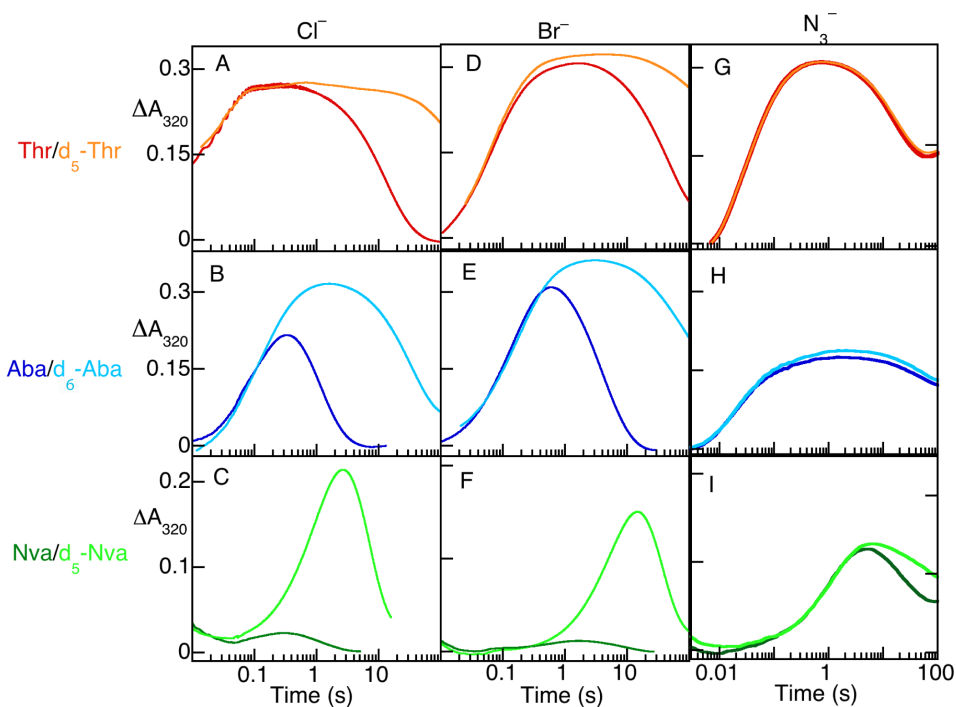

**Supplementary Figure 9.**  $^2\text{H}$ -KIE observed on decay of chloro-, bromo- and azido-ferryl complexes formed with deuterated Thr-S-SyrB1, Aba-S-SyrB1, and Nva-S-SyrB1 substrates. Absorbance-versus-time traces (320 nm) obtained after  $\text{O}_2$ -saturated buffer was mixed with an equal volume of an  $\text{O}_2$ -free solution of Fe(II), SyrB2,  $\alpha\text{KG}$ , and either  $\text{Cl}^-$  (**a-c**)<sup>1</sup>,  $\text{Br}^-$  (**d-f**), or  $\text{N}_3^-$  (**g-i**) and either Thr-S-SyrB1 (*red traces*),  $d_5$ -Thr-S-SyrB1 (*orange traces*), Aba-S-SyrB1 (*dark blue traces*),  $d_5$ -Aba-S-SyrB1 (*light blue traces*), Nva-S-SyrB1 (*dark green traces*) or  $d_5$ -Nva-S-SyrB1 (*light green traces*). The absence of a  $^2\text{H}$ -KIE in the SyrB2 reaction with  $\text{N}_3^-$  and the poorest  $\text{H}\cdot$ -donating substrate, Thr-S-SyrB1, and the onset of a detectable effect upon use of the better  $\text{H}\cdot$  donors (Aba-S-SyrB1 and Nva-S-SyrB1) suggests that at least a fraction of the intermediate decays productively via  $\text{H}\cdot$  abstraction from the substrate. Note that the red trace in **g** was scaled by a factor of 1.2 to adjust for amplitude variation. All traces are averages of at least three trials (stopped-flow "shots").

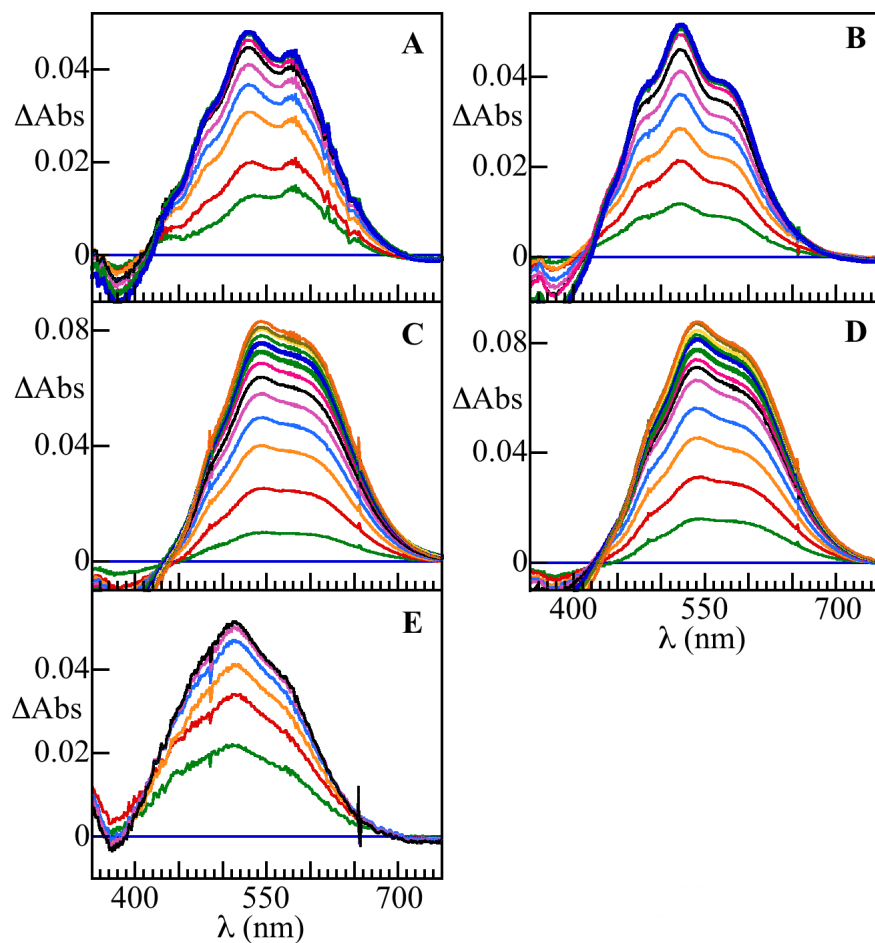

**Supplementary Figure 10.** Effect of anion binding to the Fe(II)• $\alpha$ KG•SyrB2-A118G complex on the absorption spectrum arising from the MLCT during titration of (a)  $\text{Cl}^-$ , (b)  $\text{Br}^-$ , (c)  $\text{N}_3^-$  (d)  $\text{OCN}^-$ , and (e)  $\text{SCN}^-$ . The method of spectral processing is summarized in **Figure 3**, and the spectra are analogous to those in **Supplementary Figure 4** for the wild-type SyrB2 protein. Each panel represents a single trial.

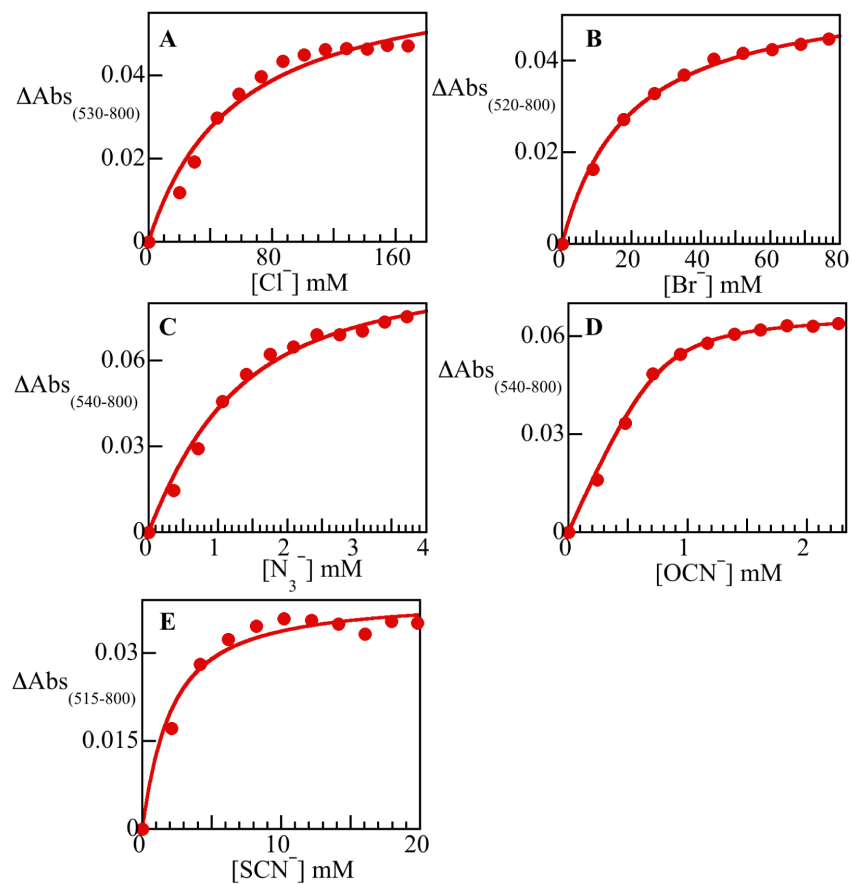

**Supplementary Figure 11.** Absorbance-versus-[anion] plots obtained from the difference spectra shown in **Supplementary Figure 10**. The  $K_D$  values for the anions reported in **Supplementary Table 1** were determined from fitting the hyperbolic binding equation (if in the weak binding regime, as in **a** and **b**) or the quadratic binding equation (if in the tight binding regime, as in **c**, **d**, and **e**) to the data. Each panel represents a single trial.



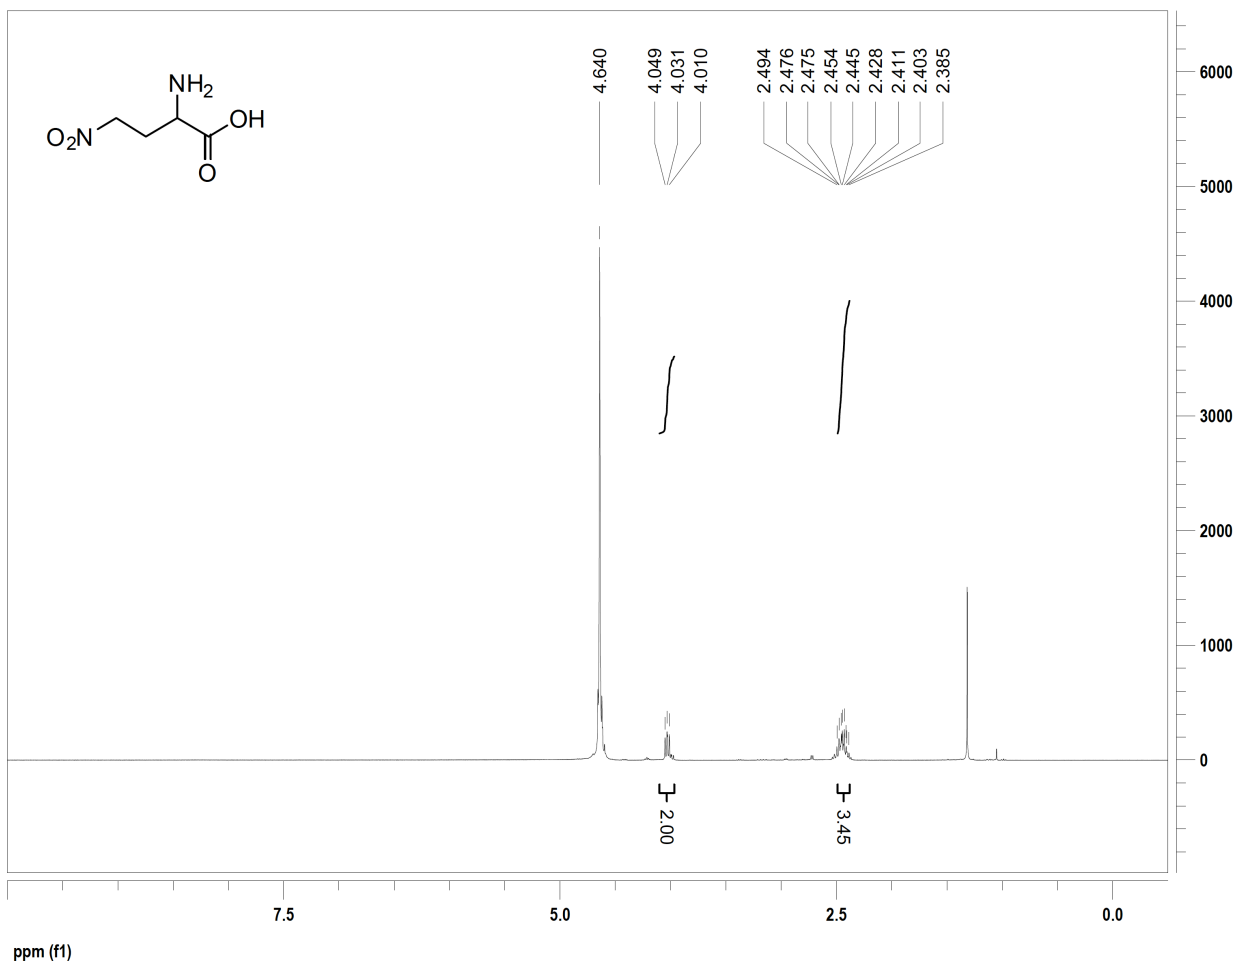

*Supplementary Figure 12.* <sup>1</sup>H-NMR spectrum of the synthetic 4-NO<sub>2</sub>-Aba standard.

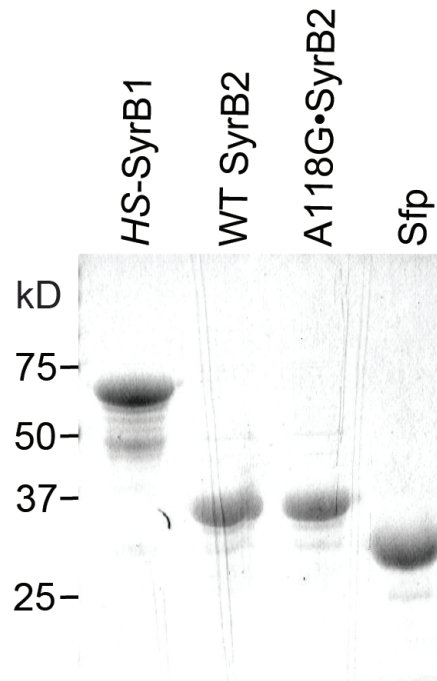

**Supplementary Figure 13.** Analysis of the protein preparations employed in this study by SDS-PAGE.

## REFERENCES

1. Matthews, M. L. *et al.* Substrate-triggered formation and remarkable stability of the C-H bond-cleaving chloroferryl intermediate in the aliphatic halogenase, SyrB2. *Biochemistry*. **48**, 4331-4343 (2009).
2. Matthews, M. L. *et al.* Substrate positioning controls the partition between halogenation and hydroxylation in the aliphatic halogenase, SyrB2. *Proc. Natl. Acad. Sci. U. S. A.* **106**, 17723-17728 (2009).
